# Supplementary material
Source: MDPI journal article supplement (https://www.mdpi.com/2073-4395/13/3/683)
Supplement: s1 [file s1]

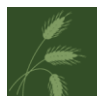

**Table S1.** Statistical analyses Resistance profile test.

Explanatory power and importance of the aleatory effects on the non-linear mixed model for the variates fresh biomass (FW), dry biomass DW, control and survival with glyphosate at two doses (X and 2X; X=1080 g ea ha<sup>-1</sup>) compared with the untreated check (UTC).

**Fresh biomass:**

| Var. | Fixed effect | Random effect |     | Model          | Log-Lik          | AIC             | BIC             | Test          | L.ratio        | df       | p-value          |
|------|--------------|---------------|-----|----------------|------------------|-----------------|-----------------|---------------|----------------|----------|------------------|
|      |              | P             | P*R |                |                  |                 |                 |               |                |          |                  |
| FW   |              |               |     | 1 lme.0        | -360.2150        | 726.4300        | 735.6555        |               |                | 3        |                  |
|      | Dose         |               |     | <b>2 lme.1</b> | <b>-338.8589</b> | <b>685.7179</b> | <b>698.0186</b> | <b>1 vs 2</b> | <b>42.7121</b> | <b>4</b> | <b>&lt;.0001</b> |
|      | Dose         | X             |     | 3 lme.1ML      | -368.2990        | 742.5981        | 751.8609        |               |                | 3        |                  |
|      | Dose         |               | X   | 4 lme.1ML      | -337.8763        | 683.7526        | 696.1030        | 3 vs 4        | 60.84552       | 4        | <.0001           |

**Multiple Comparisons of Means: Tukey Contrasts**

Linear Hypotheses:

|           | Estimate | Std. Error | z value | Pr(> z )     |
|-----------|----------|------------|---------|--------------|
| 1 - 0 = 0 | -1.6809  | 0.3402     | -4.940  | < 1e-04 ***  |
| 2 - 0 = 0 | -2.9452  | 0.3402     | -8.656  | < 1e-04 ***  |
| 2 - 1 = 0 | -1.2643  | 0.3402     | -3.716  | 0.000577 *** |

---

Signif. codes: 0 '\*\*\*' 0.001 '\*\*' 0.01 '\*' 0.05 '.' 0.1 ' ' 1

(Adjusted p values reported -- single-step method)

**Normality and homoscedacity tests**

Shapiro-Wilk normality test

data: residuals(lme.1)

W = 0.99201, p-value = 0.5063

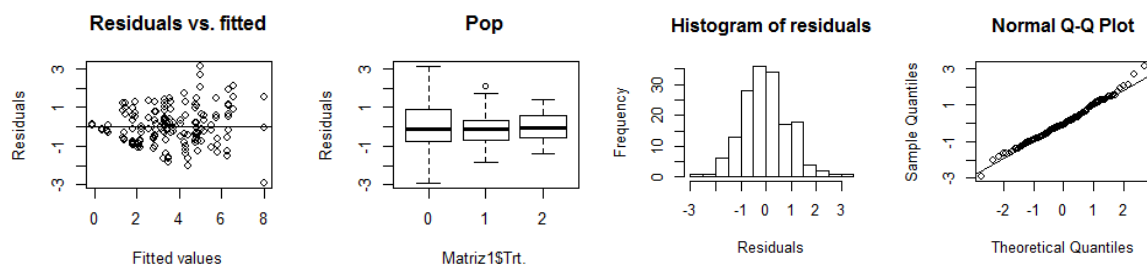

**Table S1.** Statistical analyses Resistance profile test (continuation).

### Dry biomass

| Var. | Fixed effect | Random effect |     | Model          | Log-Lik          | AIC             | BIC             | Test          | L.ratio         | df       | p-value          |
|------|--------------|---------------|-----|----------------|------------------|-----------------|-----------------|---------------|-----------------|----------|------------------|
|      |              | P             | P*R |                |                  |                 |                 |               |                 |          |                  |
| DW   |              |               |     | 1 lme.0        | -127.1350        | 260.2700        | 269.4955        |               |                 | 3        |                  |
|      | Dose         |               |     | <b>2 lme.1</b> | <b>-100.7269</b> | <b>209.4538</b> | <b>221.7545</b> | <b>1 vs 2</b> | <b>52.81618</b> | <b>4</b> | <b>&lt;.0001</b> |
|      | Dose         | X             |     | 3 lme.1ML      | -122.07611       | 250.1522        | 259.4150        |               |                 | 3        |                  |
|      | Dose         |               | X   | 4 lme.1ML      | -96.83748        | 201.6750        | 214.0254        | <b>3 vs 4</b> | <b>50.47725</b> | <b>4</b> | <b>&lt;.0001</b> |

### Multiple Comparisons of Means: Tukey Contrasts

Linear Hypotheses:

|           | Estimate | Std. Error | z value | Pr(> z )     |
|-----------|----------|------------|---------|--------------|
| 1 - 0 = 0 | -0.27833 | 0.07621    | -3.652  | 0.000767 *** |
| 2 - 0 = 0 | -0.58852 | 0.07621    | -7.723  | < 1e-04 ***  |
| 2 - 1 = 0 | -0.31019 | 0.07621    | -4.070  | 0.000155 *** |

---

Signif. codes: 0 '\*\*\*' 0.001 '\*\*' 0.01 '\*' 0.05 '.' 0.1 ' ' 1

(Adjusted p values reported -- single-step method)

### Normality and homoscedacity test

Pearson.test(residuals(lme.1))

Pearson chi-square normality test

data: residuals(lme.1)

P = 18.543, p-value = 0.138

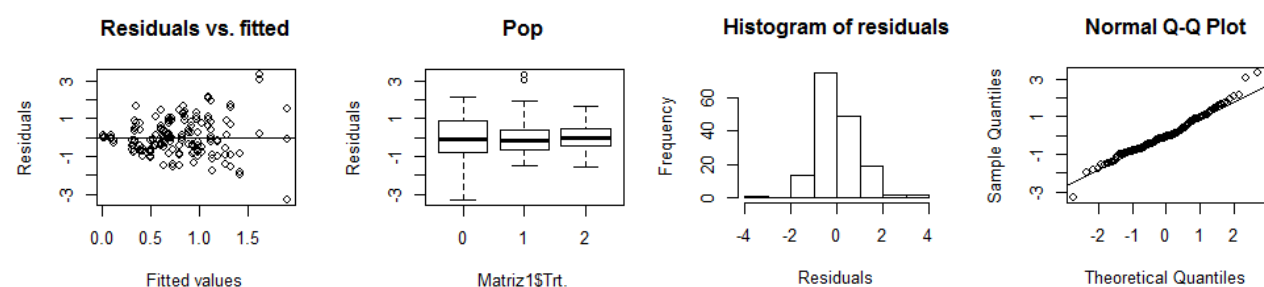

**Table S1.** Statistical analyses Resistance profile test (continuation).

# Control

| Var.    | Fixed effect | Random effect |     | Model          | Log-Lik          | AIC             | BIC             | Test          | L.ratio         | df       | p-value          |
|---------|--------------|---------------|-----|----------------|------------------|-----------------|-----------------|---------------|-----------------|----------|------------------|
|         |              | P             | P*R |                |                  |                 |                 |               |                 |          |                  |
| Control |              |               |     | 1 lme.0        | -778.0623        | 1562.125        | 1571.350        |               |                 | 3        |                  |
|         | Dose         |               |     | <b>2 lme.1</b> | <b>-743.8491</b> | <b>1495.698</b> | <b>1507.999</b> | <b>1 vs 2</b> | <b>68.42636</b> | <b>4</b> | <b>&lt;.0001</b> |
|         | Dose         | X             |     | 3 lme.1ML      | -815.4205        | 1636.841        | 1646.104        |               |                 | 3        |                  |
|         | Dose         |               | X   | 4 lme.1ML      | -748.0930        | 1504.186        | 1516.536        | <b>3 vs 4</b> | <b>134.655</b>  | <b>4</b> | <b>&lt;.0001</b> |

## Multiple Comparisons of Means: Tukey Contrasts

Linear Hypotheses:

|           | Estimate | Std. Error | z value | Pr(> z )     |
|-----------|----------|------------|---------|--------------|
| 1 - 0 = 0 | 42.556   | 4.039      | 10.536  | < 1e-06 ***  |
| 2 - 0 = 0 | 62.111   | 4.039      | 15.378  | < 1e-06 ***  |
| 2 - 1 = 0 | 19.556   | 4.039      | 4.842   | 3.51e-06 *** |

---

Signif. codes: 0 '\*\*\*' 0.001 '\*\*' 0.01 '\*' 0.05 '.' 0.1 ' ' 1

(Adjusted p values reported -- single-step method)

## Normality and homoscedacity test

Shapiro-Wilk normality test

data: residuals(lme.1)

W = 0.9846, p-value = 0.06967

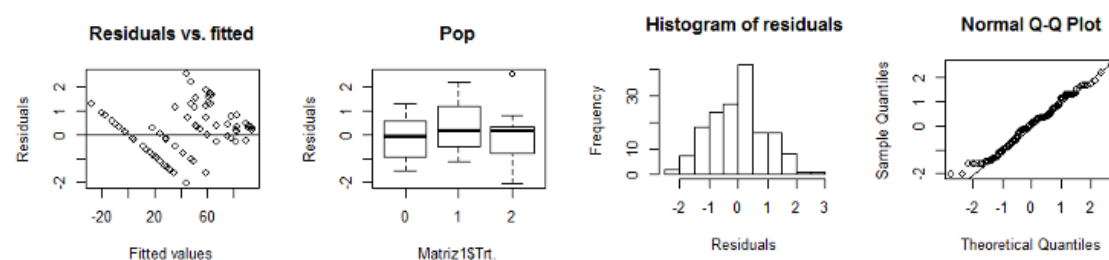

**Table S1.** Statistical analyses Resistance profile test (continuation).

## Survival

| Var.      | Fixed effect | Random effect |     | Model          | Log-Lik          | AIC             | BIC             | Test          | L.ratio         | df       | p-value          |
|-----------|--------------|---------------|-----|----------------|------------------|-----------------|-----------------|---------------|-----------------|----------|------------------|
|           |              | P             | P*R |                |                  |                 |                 |               |                 |          |                  |
| Survi-val |              |               |     | 1 lme.0        | -54.25396        | 114.50792       | 123.73344       |               |                 | 3        |                  |
|           | Dose         |               |     | <b>2 lme.1</b> | <b>-38.80372</b> | <b>85.60745</b> | <b>97.90814</b> | <b>1 vs 2</b> | <b>30.90048</b> | <b>4</b> | <b>&lt;.0001</b> |
|           | Dose         | X             |     | 3 lme.1ML      | -48.33282        | 102.66564       | 111.92843       |               |                 | 3        |                  |
|           | Dose         |               | X   | 4 lme.1ML      | -33.97487        | 75.94974        | 88.30012        | <b>3 vs 4</b> | <b>28.7159</b>  | <b>4</b> | <b>&lt;.0001</b> |

## Multiple Comparisons of Means: Tukey Contrasts

Linear Hypotheses:

Estimate Std. Error z value Pr(>|z|)

1 - 0 == 0 -0.1296 0.0529 -2.451 0.03782 \*

2 - 0 == 0 -0.2963 0.0529 -5.601 < 0.001 \*\*\*

2 - 1 == 0 -0.1667 0.0529 -3.151 0.00465 \*\*

---

Signif. codes: 0 '\*\*\*' 0.001 '\*\*' 0.01 '\*' 0.05 '.' 0.1 ' ' 1

(Adjusted p values reported -- single-step method)

## Normality and homoscedacity test

Pearson chi-square normality test

data: residuals(lme.1)

P = 256.57, p-value < 2.2e-16

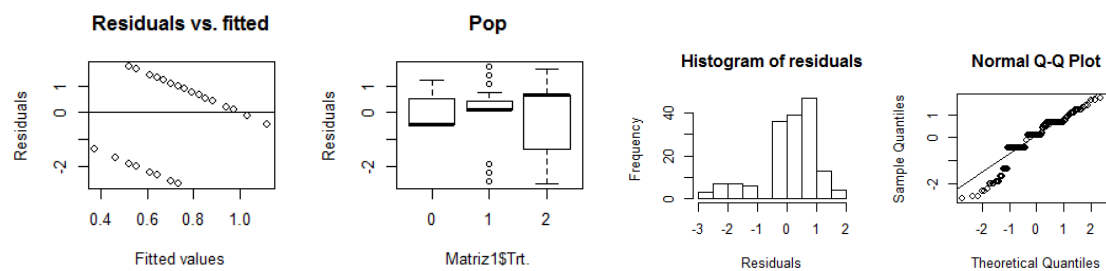

**Table S2.** *E. bonariensis* response to glyphosate from different agroecosystems (resistance profile test).

| Crop/<br>Landscape          | Plantain             |                      |                      | Red beans            |                      | Papaya               | Banana               | Passion-fruit        | Cassava              | Urban area           |
|-----------------------------|----------------------|----------------------|----------------------|----------------------|----------------------|----------------------|----------------------|----------------------|----------------------|----------------------|
| Code                        | P <sub>9</sub>       | P <sub>10</sub>      | P <sub>14</sub>      | P <sub>12</sub>      | P <sub>19</sub>      | P <sub>15</sub>      | P <sub>18</sub>      | P <sub>20</sub>      | P <sub>4</sub>       | P <sub>13</sub>      |
| <b>Survival<sup>a</sup></b> | R <sub>2</sub>       | R <sub>2</sub>       | R <sub>2</sub>       | R <sub>2</sub>       | R <sub>1</sub>       | R <sub>2</sub>       | R <sub>1</sub>       | R <sub>2</sub>       | R <sub>2</sub>       | R <sub>2</sub>       |
| <b>Control<sup>b</sup></b>  | R <sub>2</sub>       | R <sub>1</sub>       | R <sub>1</sub>       | R <sub>2</sub>       | R <sub>2</sub>       | R <sub>2</sub>       | R <sub>1</sub>       | R <sub>2</sub>       | R <sub>2</sub>       | R <sub>2</sub>       |
| <b>Rel-FW<sup>b</sup></b>   | R <sub>2</sub>       | R <sub>1</sub>       | R <sub>1</sub>       | R <sub>2</sub>       | R <sub>1</sub>       | R <sub>2</sub>       |
| <b>Rel-DW<sup>b</sup></b>   | R <sub>2</sub>       | R <sub>1</sub>       | R <sub>1</sub>       | R <sub>1</sub>       | R <sub>2</sub>       | R <sub>2</sub>       | R <sub>1</sub>       | R <sub>2</sub>       | R <sub>2</sub>       | R <sub>2</sub>       |
| <b>Overall (mode)</b>       | <b>R<sub>2</sub></b> | <b>R<sub>1</sub></b> | <b>R<sub>1</sub></b> | <b>R<sub>2</sub></b> |

<sup>a</sup>Adapted from Beres et al., 2018 [26]<sup>b</sup>Adapted from Panozzo et al., 2015 [25] and Zabala et al., 2019 [22]; Rel-FW= relative fresh weight, Rel-DW= relative dry weight**Table S3.** Statistical analyses Dose-response test.**Variate: Survival rate**

Model selection:

| Model       | logLik              | AIC                | Lack.of.fit       | Res.var            |
|-------------|---------------------|--------------------|-------------------|--------------------|
| <b>LL.2</b> | <b>-6.618261217</b> | <b>35.23652243</b> | <b>0.99596638</b> | <b>0.069306089</b> |
| LL.2.1      | -6.618261217        | 35.23652243        | 0.99596638        | 0.069306089        |
| LL.2.2      | -6.618511745        | 35.23702349        | 0.99596508        | 0.069306338        |
| LL.2.3      | -6.409354185        | 44.81870837        | 0.97352653        | 0.071863544        |
| LL.3u       | -6.619354273        | 45.23870855        | 0.96768999        | 0.072079459        |
| LL.2.3u     | -6.620356212        | 45.24071242        | 0.96766015        | 0.07208049         |
| bcl3        | -5.556161221        | 53.11232244        | 0.91878477        | 0.073950994        |

**Model parameters: Survival rate**

|      | coefficients.lph.LL2. | Std. Error | t-value | p-value  |     |
|------|-----------------------|------------|---------|----------|-----|
| b:15 | 1.835409446           | 0.7108     | 2.58232 | 0.010921 | *   |
| b:10 | 0.93010475            | 0.3044     | 3.05564 | 0.002726 | **  |
| b:7  | 1.881152422           | 0.6927     | 2.71560 | 0.007515 | **  |
| b:5  | 0.833306816           | 0.5914     | 1.40902 | 0.161218 |     |
| b:3  | 7.794235361           | 114.0000   | 0.06837 | 0.945594 |     |
| e:15 | 6638.014633           | 1682.4000  | 3.94556 | 0.000130 | *** |
| e:10 | 6857.933205           | 2549.6000  | 2.68981 | 0.008087 | **  |
| e:7  | 326.6373824           | 79.5520    | 4.10596 | 0.070720 | *** |
| e:5  | 45454.88929           | 58863.0000 | 0.77221 | 0.441392 |     |
| e:3  | 651.2751405           | 1346.4000  | 0.48372 | 0.629412 |     |

Res. Std.err: 0.2632605 (130 degrees of freedom)

**Lack-of-fit test: Survival rate**

| Model     | Df  | RSS        | Df | F.value    | p.value    |
|-----------|-----|------------|----|------------|------------|
| ANOVA     | 105 | 8.25       |    |            |            |
| DRC Model | 130 | 9.00979163 | 25 | 0.38680301 | 0.99596638 |

**Supplementary table S3.** Statistical analyses Dose-response test (continuation)**ED Estimations: Survival rate**

| Estimate | Std. Error |
|----------|------------|
|----------|------------|

|         |          |        |
|---------|----------|--------|
| e:15:50 | 8.773.5  | 0.259  |
| e:15:80 | 9.553.2  | 0.432  |
| e:15:90 | 10.009.3 | 0.586  |
| e:10:50 | 8.748.2  | 0.457  |
| e:10:80 | 10.349.5 | 0.694  |
| e:10:90 | 11.286.2 | 0.994  |
| e:7:50  | 573.0    | 0.275  |
| e:7:80  | 649.6    | 0.391  |
| e:7:90  | 694.4    | 0.520  |
| e:5:50  | 1.077.2  | 1.378  |
| e:5:80  | 12.646.5 | 2.819  |
| e:5:90  | 13.742.8 | 3.719  |
| e:3:50  | 606.1    | 9.135  |
| e:3:80  | 615.4    | 10.768 |
| e:3:90  | 620.8    | 11.763 |

**Variate: Visual control**

## Model selection

| Model | logLik            | AIC               | Lack.of.fit    | Res.var         |
|-------|-------------------|-------------------|----------------|-----------------|
| LL.4  | -486.60090        | 1015.20200        | 0.88333        | 71.35836        |
| L3m   | <b>-495.62560</b> | <b>1013.25100</b> | <b>0.50620</b> | <b>68.95520</b> |
| BC.5  | -482.38710        | 1016.77400        | 0.99519        | 70.11084        |
| bcl4  | -482.38710        | 1016.77400        | 0.99519        | 70.11084        |
| LL.5  | -484.69470        | 1021.38900        | 0.83766        | 72.46064        |

### Lack-of-fit test: Visual control

| <b>L3m</b> | <b>ModelDf</b> | <b>RSS</b> | <b>Df</b> | <b>F.value</b> | <b>p.value</b> |
|------------|----------------|------------|-----------|----------------|----------------|
| ANOVA      | 105            | 7906.25    |           |                |                |
| DRC Model  | 130            | 9741.31743 | 25        | 0.97483424     | 0.506233       |

**Table S3.** Statistical analyses Dose-response test (continuation).

**Parameter estimates: Visual control**

|      | Estimate   | Std. Error | t-value | p-value   |     |
|------|------------|------------|---------|-----------|-----|
| b:15 | -7.847149  | 14.06143   | -0.5581 | 0.5778    |     |
| b:10 | -20.143684 | 167.274198 | -0.1204 | 0.90434   |     |
| b:7  | -3.637575  | 0.877433   | -4.1457 | 6.20E-05  | *** |
| b:5  | -0.94251   | 0.155807   | -6.0492 | 1.565E-08 | *** |
| b:3  | -2.138665  | 0.303581   | -7.0448 | 1.102E-10 | *** |
| d:15 | 92.495553  | 4.156758   | 22.2519 | 2.20E-16  | *** |
| d:10 | 90.416561  | 2.397196   | 37.7176 | 2.20E-16  | *** |
| d:7  | 99.440929  | 2.111516   | 47.0946 | 2.20E-16  | *** |
| d:5  | 103.282865 | 9.755448   | 10.5872 | 2.20E-16  | *** |
| d:3  | 100.767928 | 2.265515   | 44.479  | 2.20E-16  | *** |
| e:15 | 8.410814   | 0.37562    | 22.3918 | 2.20E-16  | *** |
| e:10 | 7.000015   | 3.529983   | 1.983   | 0.04956   |     |
| e:7  | 4.855522   | 0.071406   | 67.9992 | 2.20E-16  | *** |
| e:5  | 7.248242   | 0.300889   | 24.0894 | 2.20E-16  | *** |
| e:3  | 5.034367   | 0.07776    | 64.742  | 2.20E-16  | *** |

---

Signif. codes: 0 '\*\*\*' 0.001 '\*\*' 0.01 '\*' 0.05 '.' 0.1 ' ' 1

Residual standard error: 8.303917 (125 degrees of freedom)

**ED Estimates: Visual control**

|         | Estimate | Std. Error |
|---------|----------|------------|
| e:15:50 | 8,410.8  | 0.3756     |
| e:15:80 | 8,587    | 0.0777     |
| e:15:90 | 8,691    | 0.1412     |
| e:10:50 | 7,000    | 3.5300     |
| e:10:80 | 7,069    | 3.8380     |
| e:10:90 | 7,109    | 4.0448     |
| e:7:50  | 486      | 0.0714     |
| e:7:80  | 524      | 0.1486     |
| e:7:90  | 546      | 0.1996     |
| e:5:50  | 7,248    | 0.3009     |
| e:5:80  | 8,719    | 0.5185     |
| e:5:90  | 9,579    | 0.6541     |
| e:3:50  | 503      | 0.0778     |
| e:3:80  | 568      | 0.1264     |
| e:3:90  | 606      | 0.1722     |

**Table S3.** Statistical analyses Dose-response test (continuation).

**Variate: Dry weight**

**Populations: P<sub>3</sub>, P<sub>7</sub> and P<sub>5</sub>**

**Model selection**

|             | <b>logLik</b>    | <b>IC</b>      | <b>Lack of fit</b> | <b>Res. Var</b>   |
|-------------|------------------|----------------|--------------------|-------------------|
| <b>LL.4</b> | <b>-11.19895</b> | <b>48.3979</b> | <b>0.96181</b>     | <b>0.08918123</b> |
| LL.4        | -11.19895        | 48.3979        | 0.96181            | 0.08918123        |
| LL2.3       | -15.93628        | 51.8726        | 0.54792            | 0.09583636        |
| BC.4        | -13.92664        | 53.8533        | 0.59821            | 0.09516533        |
| BC.5        | -11.01851        | 54.0370        | 0.84369            | 0.09265973        |

|     | <b>Estimate</b> | <b>Std. Error</b> | <b>t-value</b> | <b>p-value</b> |     |
|-----|-----------------|-------------------|----------------|----------------|-----|
| b:7 | 3.27E+04        | 2.52E+04          | 12.963         | 0.199004       |     |
| b:5 | 1.05E+04        | 5.29E+03          | 19.838         | 0.051096       | .   |
| b:3 | 2.47E+04        | 7.34E+03          | 33.590         | 0.001254       | **  |
| c:7 | 1.69E+03        | 7.73E+02          | 21.915         | 0.031649       | *   |
| c:5 | 6.84E+01        | 4.00E+03          | 0.0171         | 0.986415       |     |
| c:3 | 1.76E+03        | 8.07E+02          | 21.781         | 0.032672       | *   |
| d:7 | 1.81E+04        | 1.49E+03          | 121.077        | <2.2E-16       | *** |
| d:5 | 1.78E+04        | 1.39E+03          | 127.997        | <2.2E-16       | *** |
| d:3 | 2.08E+04        | 1.49E+03          | 139.988        | <2.2E-16       | *** |
| e:7 | 1.09E+06        | 1.50E+05          | 72.808         | 3.34E-10       | *** |
| e:5 | 1.94E+07        | 1.07E+07          | 18.062         | 0.075066       | .   |
| e:3 | 1.66E+06        | 2.70E+05          | 61.351         | 4.16E-05       | *** |

---

Signif. codes: 0 '\*\*\*' 0.001 '\*\*' 0.01 '\*' 0.05 '.' 0.1 ' ' 1

Residual standard error:

0.2986323 (72 degrees of freedom)

**ED Estimates: Dry weight**

|        | <b>Estimate</b> | <b>Std. Error</b> |
|--------|-----------------|-------------------|
| e:7:50 | 108.99          | 14.97             |
| e:7:80 | 166.61          | 65.16             |
| e:7:90 | 213.56          | 122.83            |
| e:5:50 | 1,935.50        | 1,071.59          |
| e:5:80 | 7,249.79        | 8,058.27          |
| e:5:90 | 15.70           | 23,228.26         |
| e:3:50 | 165.73          | 27.01             |
| e:3:80 | 290.81          | 66.33             |
| e:3:90 | 404.08          | 123.16            |



**Table S3.** Statistical analyses Dose-response test (continuation).

**Lack-of-fit test: Dry weight**

| Model     | Df | RSS    | Df | F.value | p.value |
|-----------|----|--------|----|---------|---------|
| ANOVA     | 63 | 6.1319 |    |         |         |
| DRC Model | 72 | 6.421  | 9  | 0.3301  | 0.9618  |

**Variate: Dry weight**

**Populations: P<sub>7</sub>, P<sub>10</sub> and P<sub>15</sub>**

**Model selection:**

|      | logLik     | IC         | Lack.of.fit | Res.var    |
|------|------------|------------|-------------|------------|
| BC.5 | -25.579545 | 83.1590907 | 0.08143591  | 0.13105608 |
| BC.4 | -31.425957 | 88.851914  | 0.01398097  | 0.14435362 |
| LL.3 | -66.323131 | 152.646261 | 1.4764E-11  | 0.31808831 |
| LL.4 | -63.923739 | 153.847479 | 6.687E-12   | 0.31294351 |
| LL.2 | -113.56494 | 241.129877 | 2.8669E-25  | 0.94191336 |

**Model Parameters: Dry weight**

|      | coefficients.cv.bc5. | Std.Err  | t-value | p-value   |     |
|------|----------------------|----------|---------|-----------|-----|
| b:15 | 6.97786361           | 8.61E+00 | 0.8106  | 0.4204003 |     |
| b:10 | 13.0010515           | 1.21E+02 | 0.107   | 0.9150904 |     |
| b:7  | 3.25263659           | 2.72E+00 | 11.979  | 0.2350539 |     |
| c:15 | 0.39611472           | 1.83E-01 | 21.637  | 0.0339523 | *   |
| c:10 | 0.27208908           | 1.05E-01 | 26.035  | 0.01129   | *   |
| c:7  | 0.16725836           | 9.68E-02 | 17.271  | 0.088623  | .   |
| d:15 | 1.27069492           | 1.06E-01 | 11.934  | <2.2e-16  | *** |
| d:10 | 0.91690971           | 1.56E-01 | 5.885   | 1.30E-07  | *** |
| d:7  | 1.80739142           | 1.81E-01 | 9.986   | 4.91E-15  | *** |
| e:15 | 4490.38218           | 1.20E+03 | 3.746   | 0.0003686 | *** |
| e:10 | 763.093737           | 1.25E+02 | 6.123   | 4.96E-08  | *** |
| e:7  | 92.1230096           | 1.60E+02 | 0.5751  | 0.5670681 |     |
| f:15 | 0.00070665           | 1.16E-04 | 6.118   | 5.05E-08  | *** |
| f:10 | 0.00499193           | 9.17E-04 | 5.443   | 7.51E-07  | *** |
| f:7  | 0.00522215           | 7.05E-02 | 0.0741  | 0.9411455 |     |

---

Signif. codes: 0 '\*\*\*' 0.001 '\*\*' 0.01 '\*' 0.05 '.' 0.1 ' ' 1

Residual standard error:

0.3620167 (69 degrees of freedom)

**Table S3.** Statistical analyses Dose-response test (continuation).

**Lack-of-fit test: Dry weight**

| Model     | ModelDf | RSS    | Df | F.value | p.value |
|-----------|---------|--------|----|---------|---------|
| ANOVA     | 63      | 7.6067 |    |         |         |
| DRC Model | 69      | 9.0429 | 6  | 1.9824  | 0.0814  |

**Calculated ED: Dry weight**

|    | ED50     | ED80     | ED90     |
|----|----------|----------|----------|
| 15 | 10330.81 | 16235.20 | 22661.99 |
| 10 | 1222.53  | 1495.91  | 1735.50  |
| 7  | 140.230  | 519.05   | 1543.00  |

**Variate: Relative biomass (Rel-DW)**

**Populations: P<sub>3</sub>, P<sub>7</sub> and P<sub>5</sub>**

**Model selection**

|              | LogLik          | AIC             | Lack of fit     | Res var         |
|--------------|-----------------|-----------------|-----------------|-----------------|
| <b>LL4.m</b> | <b>-345.229</b> | <b>710.4587</b> | <b>0.992759</b> | <b>243.5197</b> |
| LL.4         | -345.221        | 716.4420        | 0.953892        | 253.6158        |
| LL2.3        | -349.719        | 719.4374        | 0.565437        | 270.9914        |
| BC.4         | -347.874        | 721.7473        | 0.591751        | 270.1505        |
| BC.5         | -345.079        | 722.1577        | 0.814939        | 263.7485        |
| LL.5         | -345.085        | 722.1706        | 0.813698        | 263.7890        |

**Lack-of-fit test: Relative biomass (Rel-DW)**

| Model     | ModelDf | RSS   | Df | F.value | p.value |
|-----------|---------|-------|----|---------|---------|
| ANOVA     | 63      | 17390 |    |         |         |
| DRC Model | 75      | 18264 | 12 | 0.2637  | 0.9928  |

**Model Parameters: Relative biomass (Rel-DW)**

|     | coefficients | Std. Error | t-value | p-value  |     |
|-----|--------------|------------|---------|----------|-----|
| b:7 | 3.26571452   | 2.37418    | 13.755  | 0.173066 |     |
| b:5 | 1.010904628  | 0.35181    | 28.734  | 0.005279 | **  |
| b:3 | 2.470450952  | 0.75235    | 32.836  | 0.001558 | **  |
| c:7 | 9.374533251  | 4.03979    | 23.205  | 0.023033 | *   |
| c:5 | -0.837888162 | 19.35525   | -0.0433 | 0.965585 |     |
| c:3 | 8.470483202  | 4.2122     | 20.109  | 0.047926 | *   |
| e:7 | 108.9986323  | 12.72486   | 85.658  | 9.98E-10 | *** |
| e:5 | 1950.336522  | 1053.76349 | 18.508  | 0.068132 | .   |
| e:3 | 166.0215529  | 25.02117   | 66.352  | 4.45E-09 | *** |

Signif. codes: 0 '\*\*\*' 0.001 '\*\*' 0.01 '\*' 0.05 '.' 0.1 ' ' 1

Residual Standard Error 15.60512 (75 degrees of freedom)

**Table S3.** Statistical analyses Dose-response test (continuation).

**ED Estimates: Relative biomass (Rel-DW)**

|        | <b>Estimate</b> | <b>Std. Error</b> |
|--------|-----------------|-------------------|
| e:7:50 | 108.9986323     | 12.7248649        |
| e:7:80 | 166.6398488     | 61.12725758       |
| e:7:90 | 213.609848      | 115.7442812       |
| e:5:50 | 1950.336522     | 1053.763489       |
| e:5:80 | 7685.55303      | 7412.821934       |
| e:5:90 | 17141.88782     | 21098.31143       |
| e:3:50 | 166.0215529     | 25.02117105       |
| e:3:80 | 290.9839015     | 71.35694815       |
| e:3:90 | 404.0424083     | 133.4583316       |

**Variate: Relative biomass (Rel-DW)**

**Populations: P<sub>7</sub>, P<sub>10</sub> and P<sub>15</sub>**

**Model selection**

|             | <b>logLik</b>     | <b>IC</b>         | <b>Lack.of.fit</b> | <b>Res.var</b>   |
|-------------|-------------------|-------------------|--------------------|------------------|
| <b>BC.5</b> | <b>-415.60659</b> | <b>857.213186</b> | <b>0.14358344</b>  | <b>1355.1517</b> |
| LL.5        | -458.91203        | 949.824051        | 3.737E-15          | 3965.19387       |
| LL.4        | -470.82569        | 961.651379        | 2.1557E-16         | 4844.44075       |
| LL.3        | -505.24061        | 1024.48122        | 3.4465E-26         | 10569.9388       |

**Lack-of-fit test: Relative biomass (Rel-DW)**

| <b>Model</b> | <b>ModelDf</b> | <b>RSS</b> | <b>Df</b> | <b>F.value</b> | <b>p.value</b> |
|--------------|----------------|------------|-----------|----------------|----------------|
| ANOVA        | 63             | 79687      |           |                |                |
| DRC Model    | 72             | 97571      | 9         | 1.571          | 0.1436         |

**Model Parameters: Relative biomass (Rel-DW)**

|      | <b>coefficients.</b> | <b>Std.Err</b> | <b>t-value</b> | <b>p-value</b> |     |
|------|----------------------|----------------|----------------|----------------|-----|
| b:15 | 8.71136612           | 35.483         | 0.2455         | 0.806763       |     |
| b:10 | 13.0233784           | 115.07         | 0.1132         | 0.910202       |     |
| b:7  | 3.37090327           | 5.3814         | 0.6264         | 0.533033       |     |
| c:15 | 33.7046305           | 18.469         | 1.8249         | 0.072165       | .   |
| c:10 | 35.9727509           | 10.627         | 3.3849         | 0.001156       | **  |
| c:7  | 9.2244268            | 10.057         | 0.9172         | 0.362101       |     |
| e:15 | 4652.45619           | 1.3973         | 13.973         | 0.166617       |     |
| e:10 | 752.996658           | 26.3369        | 263.369        | <2.2E-16       | *** |
| e:7  | 67.5610202           | 205.4          | 0.3289         | 0.743163       |     |
| f:15 | 0.06409517           | 7.3763         | 73.763         | 2.22E-10       | *** |
| f:10 | 0.75487964           | 12.0667        | 120.667        | <2.2E-16       | *** |
| f:7  | 1.58035271           | 19.751         | 0.08           | 0.936447       |     |

Signif. codes: 0 '\*\*\*' 0.001 '\*\*' 0.01 '\*' 0.05 '.' 0.1 ' ' 1

Residual standard error: 36.81239 (72 degrees of freedom)

**Table S3.** Statistical analyses Dose-response test (continuation)

---

**ED Calculated: Relative biomass (Rel-DW)**

|    | <b>ED50 Calc</b> | <b>ED80 Calc</b> | <b>ED90 Calc</b> |
|----|------------------|------------------|------------------|
| 15 | 407.26           | 2603.50          | 11248.11         |
| 10 | 9102.33          | 12703.40         | 16232.94         |
| 7  | 1283.01          | 1567.13          | 1817.95          |

---

**Table S4.** Statistical analyses alternative herbicides evaluation.

**Explanatory variable:** Relative biomass (Rel-DW)

**Anova Table**

|           | Df | Sum Sq | Mean Sq | F Value | Pr(>F)   |     |
|-----------|----|--------|---------|---------|----------|-----|
| Trat      | 4  | 9566   | 2391.4  | 21.463  | 5.85E-10 | *** |
| Pob       | 2  | 5823   | 2911.3  | 26.129  | 2.94E-08 | *** |
| Trat:Pob  | 8  | 7939   | 992.3   | 8.906   | 3.25E-07 | *** |
| Residuals | 45 | 5014   | 111.4   |         |          |     |

----

Signif. codes: 0 '\*\*\*' 0.001 '\*\*' 0.01 '\*' 0.05 '.' 0.1 ' ' 1

| Population 20 |    |        |         |         |          |     |
|---------------|----|--------|---------|---------|----------|-----|
|               | Df | Sum Sq | Mean Sq | F Value | Pr(>F)   |     |
| Trat          | 4  | 11932  | 2983.1  | 19.81   | 7.53E-06 | *** |
| Residuals     | 15 | 2258   | 150.6   |         |          |     |

----

Signif. codes: 0 '\*\*\*' 0.001 '\*\*' 0.01 '\*' 0.05 '.' 0.1 ' ' 1

| Tukey Print (TkRDW20) |          |           |          |                      |          |          |          |          |
|-----------------------|----------|-----------|----------|----------------------|----------|----------|----------|----------|
|                       | MSerror  | Df        | Mean     | CV                   | MSD      |          |          |          |
|                       | 150.5535 | 15        | 48.64553 | 25.22333             | 26.79151 |          |          |          |
| \$parameters          |          |           |          |                      |          |          |          |          |
|                       | test     | name.t    | ntr      | Studentized<br>Range | alpha    |          |          |          |
|                       | Tukey    | Trat      | 5        | 4.366985             | 0.05     |          |          |          |
| \$means               |          |           |          |                      |          |          |          |          |
|                       | Rel.DW   | std       | r        | Min                  | Max      | Q25      | Q50      | Q75      |
| T1                    | 71.18156 | 20.106932 | 4        | 53.025937            | 99.13545 | 59.07781 | 66.28242 | 78.38617 |
| T2                    | 73.77522 | 15.551282 | 4        | 55.331412            | 93.37176 | 68.29971 | 73.19885 | 78.67435 |
| T3                    | 13.83285 | 8.205247  | 4        | 2.305476             | 20.74928 | 10.95101 | 16.13833 | 19.02017 |
| T4                    | 58.78963 | 4.102624  | 4        | 55.331412            | 64.55331 | 56.19597 | 57.63689 | 60.23055 |
| T5                    | 25.64841 | 4.741196  | 4        | 19.596542            | 31.12392 | 23.91931 | 25.9366  | 27.66571 |
| \$comparison          |          |           |          |                      |          |          |          |          |
| NULL                  |          |           |          |                      |          |          |          |          |
| \$groups              |          |           |          |                      |          |          |          |          |
|                       | Rel.DW   | groups    |          |                      |          |          |          |          |
| T2                    | 73.77522 | a         |          |                      |          |          |          |          |
| T1                    | 71.18156 | a         |          |                      |          |          |          |          |
| T4                    | 58.78963 | a         |          |                      |          |          |          |          |
| T5                    | 25.64841 | b         |          |                      |          |          |          |          |
| T3                    | 13.83285 | b         |          |                      |          |          |          |          |

**Table S4.** Statistical analyses alternative herbicides evaluation (cont.)

| Population 10 |
|---------------|
|---------------|

|           | Df | Sum Sq | Mean Sq | F Value | Pr(>F) |    |
|-----------|----|--------|---------|---------|--------|----|
| Trat      | 4  | 3462   | 865.4   | 5.887   | 0.0047 | ** |
| Residuals | 15 | 2205   | 147     |         |        |    |

----

Signif. codes: 0 '\*\*\*' 0.001 '\*\*' 0.01 '\*' 0.05 '.' 0.1 ' ' 1

| Tukey     | print(TkRDW10) |           |          |                  |          |           |           |          |
|-----------|----------------|-----------|----------|------------------|----------|-----------|-----------|----------|
|           | MSerror        | Df        | Mean     | CV               | MSD      |           |           |          |
|           | 147.0134       | 15        | 31.53005 | 38.45509         | 26.47465 |           |           |          |
|           | \$parameters   |           |          |                  |          |           |           |          |
|           | test           | name.t    | ntr      | StudentizedRange | alpha    |           |           |          |
|           | Tukey          | Trat      | 5        | 4.366985         | 0.05     |           |           |          |
| \$means   |                |           |          |                  |          |           |           |          |
|           | Rel.DW         | std       | r        | Min              | Max      | Q25       | Q50       | Q75      |
| T1        | 51.36612       | 15.222282 | 4        | 36.065574        | 72.13115 | 43.442623 | 48.63388  | 56.55738 |
| T2        | 14.48087       | 13.661202 | 4        | 4.371585         | 33.87978 | 5.191257  | 9.836066  | 19.12568 |
| T3        | 31.42077       | 7.591499  | 4        | 20.765027        | 38.25137 | 28.961749 | 33.333333 | 35.79235 |
| T4        | 39.61749       | 3.61097   | 4        | 37.15847         | 44.80874 | 37.15847  | 38.251366 | 40.71038 |
| T5        | 20.76503       | 15.686011 | 4        | 6.557377         | 42.62295 | 11.47541  | 16.939891 | 26.22951 |
| \$groups  |                |           |          |                  |          |           |           |          |
|           | Rel.DW         | groups    |          |                  |          |           |           |          |
| T1        | 51.36612       | a         |          |                  |          |           |           |          |
| T4        | 39.61749       | ab        |          |                  |          |           |           |          |
| T3        | 31.42077       | ab        |          |                  |          |           |           |          |
| T5        | 20.76503       | b         |          |                  |          |           |           |          |
| T2        | 14.48087       | b         |          |                  |          |           |           |          |
|           | Population 15  |           |          |                  |          |           |           |          |
|           | Df             | Sum Sq    | Mean Sq  | F Value          | Pr(>F)   |           |           |          |
| Trat      | 4              | 2110.2    | 527.6    | 14.37            | 5.13E-05 |           | ***       |          |
| Residuals | 15             | 550.5     | 36.7     |                  |          |           |           |          |

----

Signif. codes: 0 '\*\*\*' 0.001 '\*\*' 0.01 '\*' 0.05 '.' 0.1 ' ' 1

|  | MSerror      | Df     | Mean     | CV               | MSD      |  |  |  |
|--|--------------|--------|----------|------------------|----------|--|--|--|
|  | 36.70068     | 15     | 25.35714 | 23.89113         | 13.22783 |  |  |  |
|  | \$parameters |        |          |                  |          |  |  |  |
|  | test         | name.t | ntr      | StudentizedRange | alpha    |  |  |  |
|  | Tukey        | Trat   | 5        | 4.366985         | 0.05     |  |  |  |

Table S4. Statistical analyses alternative herbicides evaluation (continuation).

| \$means |          |          |   |          |          |          |          |          |
|---------|----------|----------|---|----------|----------|----------|----------|----------|
|         | Rel.DW   | std      | r | Min      | Max      | Q25      | Q50      | Q75      |
| T1      | 43.57143 | 7.514159 | 4 | 37.14286 | 54.28571 | 39.28571 | 41.42857 | 45.71429 |
| T2      | 20       | 3.086067 | 4 | 17.14286 | 24.28571 | 18.21429 | 19.28571 | 21.07143 |
| T3      | 12.85714 | 1.166424 | 4 | 11.42857 | 14.28571 | 12.5     | 12.85714 | 13.21429 |
| T4      | 22.85714 | 3.499271 | 4 | 18.57143 | 27.14286 | 21.78571 | 22.85714 | 23.92857 |

|          |          |           |   |          |          |      |          |          |
|----------|----------|-----------|---|----------|----------|------|----------|----------|
| T5       | 27.5     | 10.193702 | 4 | 17.14286 | 41.42857 | 22.5 | 25.71429 | 30.71429 |
| \$groups | Rel.DW   | groups    |   |          |          |      |          |          |
| T1       | 43.57143 | a         |   |          |          |      |          |          |
| T5       | 27.5     | b         |   |          |          |      |          |          |
| T4       | 22.85714 | bc        |   |          |          |      |          |          |
| T2       | 20       | bc        |   |          |          |      |          |          |
| T3       | 12.85714 | c         |   |          |          |      |          |          |

#### Explanatoty variable: Visual Control 14 DAA

| ANOVA         |    |        |         |         |          |     |  |
|---------------|----|--------|---------|---------|----------|-----|--|
|               | Df | Sum Sq | Mean Sq | F value | Pr(>F)   |     |  |
| Trat          | 4  | 15585  | 3896    | 8.88    | 4.34E-06 | *** |  |
| Pob           | 2  | 6928   | 3464    | 7.89    | 0.000695 | *** |  |
| Time          | 1  | 2253   | 2253    | 5.13    | 0.025857 | *   |  |
| Trat:Pob      | 8  | 7216   | 902     | 2.06    | 0.048603 | *   |  |
| Trat:Time     | 4  | 1424   | 356     | 0.81    | 0.521385 |     |  |
| Pob:Time      | 2  | 1858   | 929     | 2.12    | 0.126395 |     |  |
| Trat:Pob:Time | 8  | 6703   | 838     | 1.91    | 0.068158 | .   |  |
| Residuals     | 90 | 39500  | 439     |         |          |     |  |

Signif. codes: 0 '\*\*\*' 0.001 '\*\*' 0.01 '\*' 0.05 '.' 0.1 ' ' 1

#### Population P20

Control 14DAA

|           | Df | Sum Sq | Mean Sq | F value | Pr(>F)   |     |
|-----------|----|--------|---------|---------|----------|-----|
| Trat      | 4  | 11907  | 2977    | 35.42   | 1.77E-07 | *** |
| Residuals | 15 | 1260   | 84      |         |          |     |

Signif. codes: 0 '\*\*\*' 0.001 '\*\*' 0.01 '\*' 0.05 '.' 0.1 ' ' 1

#### HSD Tukey test

| groups | Control14 | groups |
|--------|-----------|--------|
| T3     | 83.75     | a      |
| T2     | 82.5      | a      |
| T5     | 80        | a      |
| T4     | 56.65     | b      |
| T1     | 20        | c      |

**Table S4.** Statistical analyses alternative herbicides evaluation (continuation)

#### Population P10

Control 14DAA

|           | Df | Sum Sq | Mean Sq | F value | Pr(>F) |   |
|-----------|----|--------|---------|---------|--------|---|
| Trat      | 4  | 2762   | 690.6   | 4.207   | 0.0176 | * |
| Residuals | 15 | 2462   | 164.2   |         |        |   |

Signif. codes: 0 '\*\*\*' 0.001 '\*\*' 0.01 '\*' 0.05 '.' 0.1 ' ' 1

#### HSD Tukey test

| \$groups | Control14 | groups |
|----------|-----------|--------|
| T2       | 85        | a      |
| T5       | 80        | ab     |

|    |       |    |
|----|-------|----|
| T4 | 78.75 | ab |
| T3 | 66.25 | ab |
| T1 | 52.5  | b  |

  

|                       |           |               |                |                |                  |   |
|-----------------------|-----------|---------------|----------------|----------------|------------------|---|
| <b>Population P15</b> |           |               |                |                |                  |   |
| Control 14DAT         |           |               |                |                |                  |   |
|                       | <b>Df</b> | <b>Sum Sq</b> | <b>Mean Sq</b> | <b>F value</b> | <b>Pr(&gt;F)</b> |   |
| Trat                  | 4         | 1482          | 370.6          | 2.695          | 0.0712           | . |
| Residuals             | 15        | 2062          | 137.5          |                |                  |   |

  

----

Signif. codes: 0 '\*\*\*' 0.001 '\*\*' 0.01 '\*' 0.05 '.' 0.1 ' ' 1

  

|                       |           |        |
|-----------------------|-----------|--------|
| <b>HSD Tukey test</b> |           |        |
| \$groups              | Control14 | groups |
| T2                    | 83.75     | a      |
| T4                    | 81.25     | a      |
| T3                    | 80        | a      |
| T5                    | 72.5      | a      |
| T1                    | 60        | a      |

  

Explanatoty variable:

Visual Control 28 DAT

  

|                       |           |               |                |                |                  |     |
|-----------------------|-----------|---------------|----------------|----------------|------------------|-----|
| <b>Population P20</b> |           |               |                |                |                  |     |
| Control 28DAA         |           |               |                |                |                  |     |
|                       | <b>Df</b> | <b>Sum Sq</b> | <b>Mean Sq</b> | <b>F value</b> | <b>Pr(&gt;F)</b> |     |
| Trat                  | 4         | 18225         | 4556           | 53.87          | 1.01E-08         | *** |
| Residuals             | 15        | 1269          | 85             |                |                  |     |

  

----

Signif. codes: 0 '\*\*\*' 0.001 '\*\*' 0.01 '\*' 0.05 '.' 0.1 ' ' 1

  

Table S4.

Statistical analyses alternative herbicides evaluation (continuation).

  

|                       |           |        |
|-----------------------|-----------|--------|
| <b>HSD Tukey test</b> |           |        |
| \$groups              | Control28 | groups |
| T5                    | 90.00     | a      |
| T3                    | 86.25     | a      |
| T1                    | 30.00     | b      |
| T2                    | 25.00     | b      |
| T4                    | 25.00     | b      |

  

|                       |           |               |                |                |                  |     |
|-----------------------|-----------|---------------|----------------|----------------|------------------|-----|
| <b>Population P10</b> |           |               |                |                |                  |     |
| Control 28DAA         |           |               |                |                |                  |     |
|                       | <b>Df</b> | <b>Sum Sq</b> | <b>Mean Sq</b> | <b>F value</b> | <b>Pr(&gt;F)</b> |     |
| Trat                  | 4         | 13595         | 3399           | 13.53          | 7.27E-05         | *** |
| Residuals             | 15        | 3769          | 251            |                |                  |     |

  

----

Signif. codes: 0 '\*\*\*' 0.001 '\*\*' 0.01 '\*' 0.05 '.' 0.1 ' ' 1

  

|                       |           |        |
|-----------------------|-----------|--------|
| <b>HSD Tukey test</b> |           |        |
| \$groups              | Control28 | groups |
| T2                    | 88.75     | a      |
| T5                    | 82.5      | a      |
| T4                    | 47.5      | b      |
| T3                    | 40        | b      |
| T1                    | 20        | b      |





**Table S5.** Studies on resistance to glyphosate levels in *E. bonariensis*.

| Country       | Class | Stage     | ED <sub>50</sub> g ae ha <sup>-1</sup> |          |                      |                    | Reference                           |
|---------------|-------|-----------|----------------------------------------|----------|----------------------|--------------------|-------------------------------------|
|               |       |           | Control                                | Survival | DW                   | FW                 |                                     |
| Colombia      | S     | rosette   |                                        |          | 729.4 <sup>a</sup>   |                    | Quintero-Pertuz et al., 2021 [16]   |
|               | R     | rosette   |                                        |          | 2,545.2 <sup>a</sup> |                    |                                     |
|               | R     | rosette   |                                        |          | 6,264.1 <sup>a</sup> |                    |                                     |
| Brazil        | S     | rosette   | 88.4                                   | -        | 34.8                 |                    | Gomes, 2014 [39]                    |
| Spain         | S     | rosette   | 15.7                                   | -        | -                    |                    | González-Torralva et al., 2010 [40] |
|               | S     | bolting   | 86.6                                   | -        | -                    |                    |                                     |
|               |       | flowering | 117.5                                  |          |                      |                    |                                     |
| Spain         | S     | rosette   |                                        |          |                      | 50.7 <sup>a</sup>  | González-Torralva et al., 2012 [44] |
|               | R     | rosette   |                                        |          |                      | 311.2 <sup>a</sup> |                                     |
| Spain         | S     | rosette   |                                        | 327.2    | 75.2 <sup>a</sup>    |                    | Tahmasebi et al., 2018 [19]         |
|               | R     | rosette   |                                        | 4,985    | 1,129.9 <sup>a</sup> |                    |                                     |
| South Africa  | S     | rosette   | 88.5                                   | -        | -                    |                    | Okumu et al., 2019 [43]             |
|               | S     | rosette   | 268.0                                  | -        | -                    |                    |                                     |
|               | R     | rosette   | 344.1                                  |          |                      |                    |                                     |
| Argentina     | R     | rosette   | 3,908.4                                |          |                      |                    | Puricelli et al., 2015 [18]         |
|               | S     | rosette   | 88                                     | -        | -                    |                    |                                     |
|               | S     | bolting   | 182                                    | -        | -                    |                    |                                     |
|               | R     | rosette   | 308.8                                  |          |                      |                    |                                     |
| United States | R     | bolting   | 861.2                                  |          |                      |                    | Moretti et al., 2016 [41]           |
|               | S     | rosette   | -                                      | 607      | 219                  |                    |                                     |
|               | S     | rosette   | -                                      | 1016     | 335                  |                    |                                     |
|               | R     | rosette   | -                                      | 40,862   | 1,279                |                    |                                     |
|               | R     | rosette   | -                                      | 56,153   | 14,261               |                    |                                     |

<sup>a</sup> Evaluated as relative biomass

S= Glyphosate susceptible; R=Glyphosate resistant
